1 **Changes in the tumor microenvironment and treatment outcome in glioblastoma: A pilot**  
2 **study.**

3 **Authors:** Sehar Ali, BS<sup>1</sup>, Thaiz F Borin, PhD<sup>1</sup>, Raziye Piranlioglu, PhD<sup>1</sup>, Roxan Ara, MBBS<sup>1</sup>,  
4 Iryna Lebedyeva, PhD<sup>2</sup>, Kartik Angara, PhD<sup>3</sup>, Bhagelu R Achyut, PhD<sup>4</sup>, Ali S. Arbab\*, MD, PhD<sup>1</sup>,  
5 Mohammad H Rashid\*, MBBS, PhD<sup>1,5</sup>

6

7 **Affiliation:**

- 8 1. Laboratory of tumor angiogenesis initiative, Georgia Cancer Center, Augusta University,  
9 1410 Laney Walker Blvd, Augusta, GA 30912
- 10 2. Department of Chemistry and Physics, Augusta University, Augusta, GA 30912
- 11 3. Department of Pediatrics and Human Development, Michigan State University, Grand  
12 Rapids, MI 49503
- 13 4. Winship Cancer Institute, Emory University, Atlanta, GA
- 14 5. Nanomedicine Research Center, Department of Neurosurgery, Cedars-Sinai Medical  
15 Center, Los Angeles, California 90048.

16

17

18 **Corresponding authors:**

19 Mohammad H. Rashid, MBBS, PhD  
20 Georgia Cancer Center, Augusta University  
21 1410 Laney Walker Blvd, Room: CN 3133  
22 Augusta, GA 30912  
23 Phone: 706-721-4375  
24 Email: [MRASHID@augusta.edu](mailto:MRASHID@augusta.edu),  
25 [MohammadHarun.Rashid@cshs.org](mailto:MohammadHarun.Rashid@cshs.org)

26

27 Ali S. Arbab, MD, PhD  
28 Georgia Cancer Center, Augusta University  
29 1410 Laney Walker Blvd, Room: CN 3315  
30 Augusta, GA 30912  
31 Phone: 706-721-8909  
32 Email: [aarbab@augusta.edu](mailto:aarbab@augusta.edu)

33

34

35 **Running title:** TME targeted therapy in GBM

36

37 **Abstract:**

38 Glioblastoma (GBM) is a hypervascular and aggressive primary malignant tumor of the central  
39 nervous system. Recent investigations showed that traditional therapies along with antiangiogenic  
40 therapies failed due to the development of post-therapy resistant and recurrent GBM. Our  
41 investigations show that there are changes in the cellular and metabolic compositions in the tumor  
42 microenvironment (TME). It can be said that tumor cell-directed therapies are ineffective and we  
43 need to rethink how to treat GBM.

44 We hypothesize that the composition of TME-associated cells will be different based on the  
45 therapy and therapeutic agents, and TME-targeting therapy will be better to decrease recurrence  
46 and improve survival. Therefore, the purpose of this study is to determine the changes in the TME  
47 in respect of T-cell population, M1 and M2 macrophage polarization status, and MDSC population  
48 following different treatments in a syngeneic model of GBM. In addition to these parameters,  
49 tumor growth and survival were also studied following different treatments.

50 The results showed that changes in the TME-associated cells were dependent on the therapeutic  
51 agents and the TME-targeting therapy improved the survival of the GBM bearing animals.

52 The current GBM therapies should be revisited to add agents to prevent the accumulation of bone  
53 marrow-derived cells in the TME or to prevent the effect of immune-suppressive myeloid cells in  
54 causing alternative neovascularization, the revival of glioma stem cells, and recurrence. Instead of  
55 concurrent therapy, a sequential strategy would be best to target TME-associated cells.

56

57 **Keywords:** Glioblastoma (GBM), Tumor microenvironment (TME), TME-associated cells,  
58 Radiation, Temozolomide, Myeloid cells, check-point inhibitor, arachidonic acid metabolites.

59

60

61

62

63

64

65

66

67

68

69

70

71

72

73

## 74 **Introduction:**

75 Even with current treatment strategies and the addition of expensive immunotherapies or  
76 antiangiogenic therapies, the prognosis of glioblastoma (GBM) is dismal (1-3). GBM is a very  
77 hypervascular and invasive malignant tumor. So much so that, current treatments consisting of  
78 surgery, radiation and chemotherapies with or without adjuvant still show no hope to patients (4-  
79 6). Interestingly, recent investigations demonstrated that traditional therapies along with newer  
80 antiangiogenic therapies are changing the cellular as well as the metabolic compositions of the  
81 tumor microenvironment (**TME**) tremendously (7-11). Therefore, newer treatment strategies  
82 targeting TME should be considered along with targeting tumor cells in GBM.

83 The TME is composed of tumor cells, stromal cells, cells from the bone marrow, and the  
84 extracellular matrix (12). Except for a few cell types, such as normal epithelial cells, myoepithelial  
85 cells, dendritic cells, M1 macrophages, N1 neutrophils and CD8 T-cells, most of the stromal and  
86 bone marrow-derived cells promote tumor growth and metastasis (10, 11, 13-15). In fact, platelets  
87 have also been shown to promote tumor growth (16-19). Therefore, it is imperative to include  
88 targeting tumor-associated cells in the current standard regimen of therapies for malignant tumors  
89 such as GBM. However, there have been limited investigations done to understand the changes in  
90 the TME following standard as well as experimental therapies in GBM.

91 Tumor induction and evolution is driven by the interplay between stromal and immune cells within  
92 the TME. Tumor-associated macrophages (TAM), a critical component of the TME, have a  
93 differential function in respect to tumor growth and metastasis (20-22). TAM recruitment,  
94 localization, and phenotypes are regulated by the tumor-secreted factors at the hypoxic areas of  
95 the tumor (23, 24). Depending on the stimuli, macrophages undergo a series of functional  
96 reprogramming as described by two different polarization states, known as M1 and M2 (24, 25).  
97 Phenotypically, M1 macrophages express high levels of major histocompatibility complex  
98 class II (MHC II), the CD68 marker, and co-stimulatory molecules CD80 and CD86. On the  
99 other hand, M2 macrophages express high levels of MHC II, CD163, CD206/MRC1, Arg-1  
100 (mouse only) and others. In the TME, classically activated macrophages, also known as M1  
101 macrophages, are activated by tumor-derived cytokines such as granulocyte monocyte colony  
102 stimulating factor (GM-CSF), interferon- $\gamma$ , and tumor necrosis factor (TNF). These M1  
103 macrophages play an important role as inducer and effector cells in polarized type 1 helper T cell  
104 (Th1) responses. These Th1 cells drive cellular immunity to eliminate cancerous cells. To  
105 accomplish Th1 activation, M1 macrophages produce high amounts of IL-12 and IL-23, and low  
106 amounts of IL-10, reactive oxygen and nitrogen species, and IL-1 $\beta$ , TNF, and IL-6 inflammatory  
107 cytokines (25, 26). M1 macrophages also release anti-tumor chemokines and chemokines such as  
108 CXCL-9 and CXCL-10 that attract Th1 cells, (27-29). Th1 cells drive cellular immunity to  
109 eliminate cancerous cells. On the other hand, M2-polarized macrophages, also known as  
110 alternatively activated macrophages are induced by IL-4, IL-13, IL-21 and IL-33 cytokines in the  
111 TME (30, 31). M2 macrophages release high levels of IL-10 and, transforming growth factor-beta  
112 (TGF- $\beta$ ) and low levels of IL-12 and IL-23 (type 2 cytokines). M2 macrophages also produce  
113 CCL-17, CCL-22, and CCL-24 chemokines that regulate the recruitment of Tregs, Th2,  
114 eosinophils, and basophils (type-2 pathway) in tumors (27, 29). The Th2 response is associated  
115 with the anti-inflammatory and immunosuppressive microenvironment, which promotes tumor  
116 growth.

117 Recent investigations including our own indicated the involvement of myeloid-derived suppressor  
118 cells (MDSCs) in the primary as well as metastatic TME (32-36). MDSCs are a heterogeneous

119 population of immature myeloid cells, generated from bone marrow hematopoietic precursor cells  
120 that fail to undergo terminal differentiation to mature monocytes or granulocytes. They are divided  
121 broadly into monocytic (CD11b+/Gr1+/Ly6C+) and granulocytic (CD11b+/Gr1+/Ly6G+) (37-  
122 39). During tumor progression, MDSCs are greatly expanded and they exhibit remarkable  
123 immunosuppressive and tumorigenic activities. They are directly implicated in the escalation of  
124 tumor metastases by partaking in the epithelial-mesenchymal transition (EMT) and, tumor cell  
125 invasion, while also promoting angiogenesis and formation of the pre-metastatic niche (13, 33,  
126 34). MDSCs were demonstrated to promote tumor invasion and metastasis by two mechanisms:  
127 (i) increasing production of multiple matrix metalloproteinases (MMPs) that degrade the extra-  
128 cellular matrix and chemokines that establish a pre-metastatic milieu (40, 41), and (ii) merging  
129 with tumor cells (42, 43).

130 From the above discussion, it is obvious that TME-associated bone marrow-derived cells are  
131 important in treatment resistance, invasion and metastasis. Therefore, the purpose of this study is  
132 to determine the changes in the TME in respect of T-cell population, M1 and M2 macrophage  
133 polarization status, and MDSC population following different treatments in a syngeneic model of  
134 GBM. In addition to these parameters, tumor growth and survival were also studied following  
135 different treatments. In this study, we have used the following agents: a drug that alters  
136 hydroxylase pathways of arachidonic acid metabolism (HET0016 and its different analogs),  
137 colony stimulating factor 1 receptor (CSF1R) inhibitor (GW2580), anti PD-1 (program death)  
138 antibody, CXCR2 receptor blockers (Navarixin and SB225002), temozolomide (TMZ),  
139 irradiation, VEGFR2 receptor tyrosine kinase inhibitor (Vatalanib), and conditional CSF1R  
140 knockout mice plus different treatments.

141

## 142 **Materials and methods:**

143 **Ethics statement:** All the experiments were performed according to the National Institutes of  
144 Health (NIH) guidelines and regulations. The Institutional Animal Care and Use Committee  
145 (IACUC) of Augusta University (protocol #2014–0625) approved all the experimental procedures.  
146 All animals were kept under regular barrier conditions at room temperature with exposure to light  
147 for 12 hours and dark for 12 hours. Food and water were offered ad libitum. All efforts were made  
148 to ameliorate the suffering of animals. CO<sub>2</sub> with a secondary method was used to euthanize  
149 animals for tissue collection.

150 **Materials:** HP $\beta$ CD (2-hydroxy Propyl- $\beta$ -Cyclodextrin) was purchased from Sigma-Aldrich (St.  
151 Louis, MO), cell culture media was from Thermo Scientific (Waltham, MA), and fetal bovine  
152 serum was purchased from Hyclone (Logan, Utah). HET0016 was made by Dr. Levedyeva in the  
153 Department of Chemistry, Augusta University with a purity of more than 97%. Cell culture grade  
154 DMSO was purchased from Fischer Scientific (PA). We made the complex of HET0016 plus  
155 HP $\beta$ CD as per our previous publication (8). VEGFR2 tyrosine kinase inhibitor (Vatalanib) and  
156 colony stimulating factor 1 receptor (CSF1R) inhibitor (GW2580) were purchased from LC  
157 Laboratories, Woburn, MA. SB225002 (CXCR2 inhibitor) was purchased from Selleckchem,  
158 Houston, TX. Navarixin was purchased from MedKoo bioscience Inc, Morrisville, NC. All flow  
159 antibodies are from Bio Legend, San Diego, CA. All antibodies for western blotting,  
160 immunohistochemistry, and immunofluorescence were purchased from Santa Cruz (total-CXCR2  
161 and anti-GAPDH), R&D systems (anti-hCXCR2), Thermo Scientific (anti-Laminin), and Sigma

162 Aldrich ( $\beta$ -actin and FITC-conjugated tomato lectin). All culture media were purchased from  
163 Corning and GE Healthcare Life Sciences.

164 **Tumor cells and orthotopic animal model of GBM:** To determine the *in vivo* effect of different  
165 treatments, orthotopic GBM models using syngeneic GL261 cells in wild type and CSF1R  
166 conditional knockout C57BL/6 mice were prepared according to our published methods (8, 10, 11,  
167 44). In short, luciferase positive GL261 cells were grown in standard growth media (RPMI-1640  
168 plus 10% FBS) and collected in serum-free media on the day of implantation. After preparation  
169 and drilling a hole at 2.25 mm (athymic nude mice) to the right and 2 mm posterior to the bregma,  
170 taking care not to penetrate the dura, a 10  $\mu$ L Hamilton syringe with a 26G-needle containing  
171 tumor cells (10,000) in a volume of 3  $\mu$ L was lowered to a depth of 4 mm and then raised to a depth  
172 of 3 mm. During and after the injection, a careful note was made for any reflux from the injection  
173 site. After completing the injection, we waited 2-3 minutes before withdrawing the needle 1 mm  
174 at a time in a stepwise manner. The surgical hole was sealed with bone wax. Finally, the skull was  
175 swabbed with betadine before suturing the skin (45-47). There were at least three animals in each  
176 group of treatment. Tumor growth was determined by optical imaging (bioluminescence imaging  
177 after injecting luciferin) on days 8, 15 and 22. For flow cytometry of tumor-associated cells,  
178 animals were euthanized on day 22 after the last optical imaging. Both male and female animals  
179 were used.

180 **Treatments:** All treatments were started on day 8 following tumor implantation and continued for  
181 two weeks. The following treatment groups were used to determine the TME associated T-cells,  
182 different macrophages, MDSCs present by flow cytometry; 1) vehicle, 2) HET0016 complexed  
183 with HP $\beta$ CD at 10mg/kg/day for 5 days/week, intravenous (IV), 3) GW2580, 160mg/kg/day  
184 3day/week, oral, 4) temozolomide (TMZ) 50mg/kg/day, 3days/week, oral, 5) Vatalanib  
185 50mg/kg/day, 5 days/week, oral, 6) Navarixin, 10mg/kg/day, 5 days/week, intraperitoneal (IP), 7)  
186 anti-PD-1 antibody, 200 $\mu$ g/dose, 2 doses/week, IP, 8) image guided radiation therapy,  
187 10Gy/dose/week for two weeks, 9) combined HET0016 plus GW2580, 10) combined HET0016  
188 plus GW2580 plus anti- PD-1 antibody.

189 **Making of a conditional knockout mouse model of bone marrow-derived CSF1R+ myeloid**  
190 **cells:** Heterozygous CSF1R<sub>flox/wt</sub>/MX1-Cre<sup>+</sup> male was mated with a heterozygous CSF1R<sub>flox/wt</sub>/MX1-Cre<sup>+</sup>  
191 female to achieve 25% of the progeny with homozygous CSF1R<sub>flox/flox</sub>/MX1-Cre<sup>+</sup> (knockout) genotype in bone marrow cells. Other progeny was wild-type CSF1R<sub>wt/wt</sub>/MX1-Cre<sup>+</sup> (25%) and heterozygous CSF1R<sub>flox/wt</sub>/MX1-Cre<sup>+</sup> (50%) genotypes. After repeated cross-breeding, we have generated a colony of CSF1R<sub>flox/flox</sub>/Cre<sup>+</sup> (knockout). These animals are healthy and are being used for breeding. Analysis of myeloid cells in the peripheral blood before and after injection of polyinosinic-polycytidylic acid (poly-IC) showed bone marrow-specific depletion of CSF1R<sup>+</sup> cells (**Figure 1**). These animals (male and female) were used to generate GL261 derived syngeneic GBM after depletion of bone marrow-derived myeloid cells and then treated with HET0016 or anti PD-1 antibody alone or in combination or with CXCR2 antagonist SB225002 (10mg/kg/day 5 days/week, IP) for two weeks.

201 **Determination of bone marrow-derived cells in the TME:** Following euthanasia, animals were  
202 perfused with ice-cold PBS and the right brain containing GBM was collected, passed through 40-  
203 micron mesh and a single-cell suspension was made. Similarly, spleens were collected, passed  
204 through 40micron mesh and a single-cell suspension was made. Before adding panels of antibody  
205 cocktail, non-specific uptake of the antibody was blocked by adding recommended blocker. The  
206 population of the following cells were determined by a Accuri C6 flow cytometer from cells

207 collected from tumors and spleen; CD45+/CD4+, CD45+/CD8+, CD45+/CD11B+/Gr1+/Ly6C+,  
208 CD45+/CD11B+/Gr1+/Ly6G+, CD45+/CD86+/CD80+, AND CD45+/CD206+. The findings  
209 were compared among all the treatment groups.

210 **Determination of tumor growth:** Bioluminescent imaging was used to determine the tumor  
211 growth following different treatments. All animals underwent imaging following IP injection of  
212 luciferin (150mg/kg). Images were obtained from all animals on days 8, 15 and 22. Photon density  
213 (photon/sec/mm<sup>2</sup>) was determined by drawing an irregular region of interest to cover the tumor  
214 area. The findings were compared among all the treatment groups.

215 **Determination of survival:** Groups of animals were also used to determine the survival following  
216 different TME targeted therapies. All animals were routinely observed 2-3 times a week to assess  
217 the wellbeing as well as body weight. The animals were followed up until they become moribund  
218 or fulfill the criteria for euthanasia as per the approved IACUC protocols. The findings were  
219 compared among all the treatment groups.

220 **Statistical analysis:** Quantitative data were expressed as mean  $\pm$  standard error of the mean (SEM)  
221 unless otherwise stated. For the flow-cytometric studies, we used ordinary one-way analysis of  
222 variance (ANOVA) followed by multiple comparisons using Dunnett's multiple comparisons test.  
223 For BLI (optical imaging) data, the general framework of analyses included two-way ANOVA  
224 followed by either Tukey's or Sidak's multiple comparisons. We analyzed the survival of the animals  
225 following different treatments. Log-rank test (Mantel-Cox) was applied to determine the significance  
226 of differences among the groups. A P value of 0.05 was considered significant.

227

## 228 **Results:**

229 In this study, we successfully developed CSF1R conditional knockout mouse. These conditional  
230 knock out mice showed homozygous CSF1R<sup>fl<sup>ox</sup>/fl<sup>ox</sup></sup>/MX1-Cre+ (knockout) genotype (**Figure 1A**).  
231 Compared to wild type mice, conditional knockout mice showed a significant dose-dependent  
232 decrease in CD45+CSF1R+ cells following two weeks of treatments with poly-IC. There was  
233 almost 80% decrease of CSF1R+ cells in the peripheral blood (**Figure 1B**). Wild type mice treated  
234 with poly-IC did not show any significant difference in CD45+CSF1R+ cells (**Figure 1C**). Both  
235 wild type (control) and knockout mice (after two weeks' of treatments with poly-IC) received  
236 intracranial implantation of syngeneic GL261 glioblastoma. On day 8 of tumor implantation,  
237 groups of animals received either vehicle or SB225002 for two weeks. All animals underwent  
238 optical imaging pre and post-treatment. Photon intensities were determined to measure tumor  
239 growth. Wild type control animals showed significantly increased tumor growth (**Figure 1D**)  
240 which is indicated by a 10-fold increase in the photon intensity (**Figure 1E**). On the other hand,  
241 both wild type (control) treated with SB225002 and knockout mice showed significantly decreased  
242 tumor growth at week 3, indicating the involvement of CSF1R+ cells in the TME. It is also known  
243 that the CXCR2 antagonist can inhibit the function of myeloid cells by blocking the interaction of  
244 CXCR2 and IL-8 (48-50). Tumor-associated CD45+CD11b+CD86+ and CD45+CD11b+CD206+  
245 cells were determined following treatment with SB225002 in wild type animals. Both cell types  
246 were significantly decreased following the treatments (**Figure 1F**). T-cells and MDSC populations  
247 showed no significant difference between the treated and untreated wild type animals.

248 Both wild type and CSF1R knockout mice received different treatments that target tumor cells or  
249 tumor-associated cells. All treatments were for two weeks and the treatment was started on day 8

250 of orthotopic tumor implantation. On day 22 following last optical imaging, animals were  
251 euthanized and the tumors were collected for flow cytometry to determine the population of T-  
252 cells (CD4, CD8), CD11b+ cells, macrophages (M1 and M2), and MDSCs (Ly6C and Ly6G). To  
253 our surprise, CD4, CD8, CD11b, and Ly6G positive cells significantly increased in tumors treated  
254 with TMZ (**Figure 2**). On the other hand, different cellular populations were significantly  
255 decreased in post-radiation tumors. All other treatments that targeted tumor-associated myeloid  
256 cells or checkpoint showed increased accumulation of CD4 and CD8 cells in the tumors but  
257 myeloid cell populations including MDSCs, CD11b+ cells, and macrophages showed insignificant  
258 changes in the TME compared to that of control and Vatalanib treated tumors (**Figure 3**).

259 All animals that were followed for survival and euthanized on day 22 to determine the TME  
260 associated cells also underwent optical imaging before treatment and at one and two weeks after  
261 treatments. The dose of luciferin and exposure time were kept identical for every animal at each  
262 time point. Then the photon intensity (intensity/sec/mm<sup>2</sup>) was determined by making an irregular  
263 region of interest encircling the tumors at each time point. **Figure 4** shows the tumor growth  
264 following different treatments. Tumor in all therapy groups except in Vatalanib treated animals,  
265 were stable following 1 week of treatments and there was no significant difference compared to  
266 that of vehicle-treated animals. However, Vatalanib treated animals showed significantly increased  
267 photon intensity indicating tumor growth following 1 week of treatments. Tumor growths were  
268 substantially increased in vehicle, Vatalanib, and TMZ treated animals following 2 weeks of  
269 therapy indicating the development of resistance in TMZ group. All other groups showed increased  
270 tumor growth but were significantly slower than that of vehicle, Vatalanib, or TMZ treated  
271 animals. It should be noted that the animals that received TME-associated cell-directed therapy  
272 showed significantly lower tumor growth 2 weeks following treatments. The animals that receive  
273 antiangiogenic (Vatalanib) and tumor cell-targeted (TMZ) therapy exhibited rebound tumor  
274 growth at 2 weeks of treatments.

275 We instituted different treatments targeting both tumor cells and the tumor microenvironment  
276 including arachidonic acid metabolisms and anti-depressant (selective serotonin reuptake inhibitor  
277 (SSRI), fluoxetine) drugs alone or in combination with TMZ. We also used a very high dose of  
278 HET0016 (50mg/kg/day). Usual dose of HET0016 is 10mg/kg/day. All treatments significantly  
279 increased the survival of animals bearing syngeneic GL261 GBM (**Figure 5A**). The most  
280 significantly increased survival was observed in animals' groups that were treated with TMZ,  
281 HET0016, TMZ+HET0016, and with a HET analog. Although Navarixin (IL-8CXCR2 axis  
282 blocker) increased the survival of the animals, the addition of TMZ did not improve survival  
283 (**Figure 5B**).

284

## 285 **Discussion:**

286 GBM is a devastating malignant tumor of the central nervous system. Once diagnosed it becomes  
287 a death sentence to patients within 15 months (51-54). Currently, surgical resection followed by  
288 radiation and TMZ therapies is the standard of care for GBM patients (55). With these extensive  
289 therapies, almost all patients show therapy resistance and recurrence of GBM (56). To address  
290 resistance and recurrence, clinicians have adopted antiangiogenic therapies in recurrent GBM.  
291 These treatments decrease the formation of new blood vessels and decrease edema, thus reducing  
292 the dose of corticosteroids needed after therapy (57, 58). Additionally, advanced immunotherapy  
293 and targeted therapies have been instituted (59). However, early reports demonstrated that these

294 are non-effective treatment strategies (10, 45, 60-65). Investigations from our lab indicated that  
295 most of the instituted therapies mobilized bone-marrow cells to the sites of GBM and orchestrated  
296 therapy resistance (10, 11). Our results showed that antiangiogenic therapies initiate alternate  
297 vascularization pathways and eventually increased neovascularization in therapy-resistant GBM  
298 (7, 45, 66). We found that angiogenic and vasculogenic myeloid cells accumulated at GBM sites  
299 following therapies(11, 65). Furthermore, we reported the process of vascular mimicry in which  
300 GBM cells transdifferentiate into glioma stem cells that can then form functional blood vessels (7,  
301 67). All of these results support our conclusion that the possible changes occurring in the TME  
302 following standard or investigational treatments in GBM have not been properly studied. This  
303 includes both changes in TME associated cells as well as the changes that occur in the metabolic  
304 cascade of TME associated cells. In this pilot study, we aimed to investigate these changes. To  
305 accomplish this, we used standard therapies (radiation and TMZ) as well as agents that targeted  
306 TME associated cells (CSF1R inhibitor GW2580 to target myeloid cells, IL-8-CXCR2 antagonists  
307 Navarixin and SB225002 to target stem cells causing vascular mimicry, anti-PD1 antibody  
308 targeting immune suppressive molecules) and different metabolic pathways (HET0016 and its  
309 analog to target CYP4A-20-HETE axis of arachidonic acid metabolisms, fluoxetine to target  
310 serotonin reuptake). Following therapies, we determined the changes in the composition of TME-  
311 associated cells and the survival benefit of the therapeutic agents alone or in combination with  
312 TMZ.

313 Our results clearly demonstrated the importance of TME associated CSF1R positive cells. Animals  
314 treated with GW2580 and conditional knockout animals (CSF1R knockout) showed a decreased  
315 number of myeloid cells in the TME, whereas TMZ therapy increased the population of myeloid  
316 cells in the treated GBM. Previously, our reported results, as well as results from different  
317 investigators, have proven the importance of myeloid cells in developing therapy resistance in  
318 GBM and other cancers (11, 13, 15, 68-70). Myeloid cells, such as macrophages and MDSCs,  
319 produce an immunosuppressive microenvironment that promotes tumor growth. Following  
320 chemotherapy, macrophage differentiation is altered to promote the production of cancer-  
321 supporting M2 macrophages in the TME (71). Chemotherapy has also been shown to promote  
322 macrophage aggregation, thus facilitating cathepsin protease B- and S- mediated therapy resistance  
323 (72). Some chemotherapeutic agents activate MDSCs to produce IL-1 $\beta$ . This leads to the secretion  
324 of IL-17 by CD4<sup>+</sup> T-cells (73). Additionally, MDSCs have been shown to partake in the epithelial-  
325 mesenchymal transition, increase the production of multiple matrix metalloproteinases, and merge  
326 tumor cells (71-73). Therefore, the addition of myeloid cell blockage could mitigate these  
327 mechanisms of resistance. However, it is to note that, previous investigations also indicated the  
328 development of resistance following long-term therapy using CSF1R inhibitors (74, 75). This  
329 indicates the importance of sequential or intermittent therapy targeting GBM TME associated cells  
330 following or in between standard therapies for GBM.

331 To our surprise, we noticed a decreased accumulation of T-cells as well as different myeloid cell  
332 populations in the TME following radiation therapies. This decreased accumulation of T-cells may  
333 be due to the disruption of intact blood vessels that act as a delivery system of T-cells to the tumor  
334 site. This disruption is likely caused by radiation therapy-induced necrosis in tumors leading to  
335 tumor cell death. Therefore, most tumor recurrence in post-radiation GBM occurs from the  
336 periphery of the irradiated areas where a few cells may have survived the radiation injury. Our  
337 previous studies showed that the addition of HET0016 (blocker of CYP4A-20-HETE axis of  
338 arachidonic acid metabolisms) improved the survival of animals bearing patient-derived xenograft  
339 (PDX) GBM following 30Gy of radiotherapy (8). HET0016 is known to inhibit tumor and



340 endothelial cell (EC) proliferation, EC migration, and prevent neovascularization including  
341 vascular mimicry (44, 67, 76). Although we have not tested agents that prevent the repair of DNA  
342 damage, the addition of PARP inhibitor may also help prevent the recurrence of GBM following  
343 radiotherapy (77, 78). However, in contrast to HET0016, PARP inhibitor has a very narrow  
344 therapeutic window and causes severe toxicity (77). Therefore, adding an inhibitor of arachidonic  
345 acid metabolic pathways may be useful in preventing the recurrence of post-radiation GBM.

346 Previously, we have reported the effectiveness of HET0016 in controlling GBM and breast cancer  
347 (8, 32). However, we had not yet reported TME-associated cells present following the treatment  
348 of HET0016. In this study, HET0016 treatment exhibited a similar phenomenon to that of myeloid  
349 cell-targeted therapies. It showed an increased T-cell population in the TME compared to that of  
350 vehicle and Vatalanib treated GBM. There was also a tendency to decrease immunosuppressive  
351 myeloid cell populations in the TME. Additionally, treatments using HET0016 and its analog  
352 showed significantly improved survival which corroborates with our previous reports (8). Our  
353 ongoing investigations show that the CYP4A-20-HETE pathway is active not only in tumor cells  
354 but also in TME associated myeloid cells (data not shown). Inhibition of 20-HETE increases the  
355 cytotoxic T-cells population in *in vitro* studies (manuscript under preparation). Details of  
356 HET0016 mediated therapies and its mechanisms are discussed in our previous reports (8).  
357 Therefore, we propose that the use of an inhibitor of the cytochrome P450  $\gamma$ -hydroxylase pathway  
358 of arachidonic acid metabolisms may be used as an agent to target post-therapy GBM to prevent  
359 recurrence.

360 **In conclusion:** current GBM therapies should be revisited to add agents to prevent the  
361 accumulation of bone marrow-derived cells in the TME or to prevent the effect of immune-  
362 suppressive myeloid cells in causing alternative neovascularization, the revival of glioma stem  
363 cells, and recurrence. Instead of concurrent therapy, a sequential strategy would be best to target  
364 TME associated cells.

365

366

367

368

369 **Acknowledgment:** The authors like to acknowledge the help of the core facility of small animal  
370 imaging (CIFSA) for acquiring optical images.

371

372

373

374

375

376

377

378

379

380 **Author Contributions Statement:**

381 Sehar Ali: Analyze the flow cytometry and optical image data. She also helped writing the  
382 manuscript.

383 Thaiz F Borin: Tumor cell propagation, tumor implantation and acquisition of flow cytometry  
384 data. She edited the manuscript.

385 Raziye Piranlioglu: Tumor cell propagation, tumor implantation and acquisition of flow  
386 cytometry data.

387 Roxan Ara: Help acquiring optical images and analysis

388 Iryna Lebedyeva: Synthesize HET0016 and its analog. Helped editing the manuscript.

389 Kartik Angara: Initiated the experiments using CXCR2 antagonist and Vatalanib treatments

390 Bhagelu R Achyut: Helped making the transgenic CSF1R knockout animals and conducted initial  
391 optimization of Poly-IC injection and depletion of CSF1R+ cells. He also helped the interpretation  
392 of TME data.

393 Ali S. Arbab: Conceived the hypothesis, design the experiments and provided the funds. He edited  
394 the manuscript.

395 Mohammad H Rashid: Helped Sehar Ali to analyze the data, interpreted the results, maintaining  
396 CSF1R knockout animal colony, tumor implantation, treating animals, acquisition of flow  
397 cytometry data, preparing graphs and wrote the manuscript.

398

399 **Conflict of Interest Statement:** *None*

400

401 **Funding source:** This study was supported by Georgia Cancer Center startup fund and  
402 intramural grant program at Augusta University to Ali S. Arbab.

403 **Contribution to the Field Statement:** Glioblastoma (GBM) is a devastating primary brain cancer.  
404 Current treatments that use surgery, chemotherapy and radiotherapy do not increase the survival  
405 of the patient. Almost all patients with GBM die with 15 months of diagnosis. GBM is also a tumor  
406 with many blood vessels, therefore, clinician started using anti-neovascular agents. However,  
407 recent reports indicated that all these treatments caused therapy resistance and enhance alternative  
408 neovascularization due to mobilization and accumulation of cells derived from patients' bone  
409 marrow. These mobilized bone marrow cells accumulate in the GBM microenvironment and  
410 initiate an environment that is immunosuppressive and increase tumor cell invasion causing  
411 recurrent tumors. There is a movement of rethinking of therapy strategies in GBM. Investigators  
412 started using immunotherapy to change the microenvironment, however, early results are not  
413 encouraging. We hypothesize that agents that target GBM microenvironment should be included  
414 along with standard therapies either concurrently or sequentially. In this studies we showed the  
415 changes in GBM microenvironment following different therapies and showed the improvement of  
416 survival in mouse model following GBM microenvironment targeting therapies.

417 **References:**

- 418 1. Uzuka T, Asano K, Sasajima T, Sakurada K, Kumabe T, Beppu T, et al. Treatment  
419 outcomes in glioblastoma patients aged 76 years or older: a multicenter retrospective cohort study.  
420 *J Neurooncol.* 2014;116(2):299-306.
- 421 2. Tsang DS, Khan L, Perry JR, Soliman H, Sahgal A, Keith JL, et al. Survival Outcomes in  
422 Elderly Patients with Glioblastoma. *Clinical oncology.* 2014.
- 423 3. Mehta M, Brem S. Recent updates in the treatment of glioblastoma: introduction. *Seminars*  
424 *in oncology.* 2014;41 Suppl 6:S1-3.
- 425 4. Tipping M, Eickhoff J, Ian Robins H. Clinical outcomes in recurrent glioblastoma with  
426 bevacizumab therapy: An analysis of the literature. *J Clin Neurosci.* 2017;44:101-6.
- 427 5. van Linde ME, Brahm CG, Hamer PCD, Reijneveld JC, Bruynzeel AME, Vandertop WP,  
428 et al. Treatment outcome of patients with recurrent glioblastoma multiforme: a retrospective  
429 multicenter analysis. *J Neuro-Oncol.* 2017;135(1):183-92.
- 430 6. Carter TC, Medina-Flores R, Lawler BE. Glioblastoma Treatment with Temozolomide and  
431 Bevacizumab and Overall Survival in a Rural Tertiary Healthcare Practice. *BioMed research*  
432 *international.* 2018;2018:6204676.
- 433 7. Angara K, Borin TF, Rashid MH, Lebedyeva I, Ara R, Lin PC, et al. CXCR2-Expressing  
434 Tumor Cells Drive Vascular Mimicry in Antiangiogenic Therapy-Resistant Glioblastoma.  
435 *Neoplasia.* 2018;20(10):1070-82.
- 436 8. Jain M, Gamage NH, Alsulami M, Shankar A, Achyut BR, Angara K, et al. Intravenous  
437 Formulation of HET0016 Decreased Human Glioblastoma Growth and Implicated Survival  
438 Benefit in Rat Xenograft Models. *Scientific reports.* 2017;7:41809.
- 439 9. Shaaban S, Alsulami M, Arbab SA, Ara R, Shankar A, Iskander A, et al. Targeting Bone  
440 Marrow to Potentiate the Anti-Tumor Effect of Tyrosine Kinase Inhibitor in Preclinical Rat Model  
441 of Human Glioblastoma. *Int J Cancer Res.* 2016;12(2):69-81.
- 442 10. Achyut BR, Shankar A, Iskander ASM, Ara R, Knight RA, Scicli AG, et al. Chimeric  
443 Mouse model to track the migration of bone marrow derived cells in glioblastoma following anti-  
444 angiogenic treatments. *Cancer Biology & Therapy.* 2016;17(3):280-90.
- 445 11. Achyut BR, Shankar A, Iskander ASM, Ara R, Angara K, Zeng P, et al. Bone marrow  
446 derived myeloid cells orchestrate antiangiogenic resistance in glioblastoma through coordinated  
447 molecular networks. *Cancer Letters.* 2015;369(2):416-26.
- 448 12. Egeblad M, Nakasone ES, Werb Z. Tumors as Organs: Complex Tissues that Interface  
449 with the Entire Organism. *Developmental Cell.* 2010;18(6):884-901.
- 450 13. Johnson BW, Achyut BR, Fulzele S, Mondal AK, Kolhe R, Arbab AS. Delineating Pro-  
451 Angiogenic Myeloid Cells in Cancer Therapy. *International journal of molecular sciences.*  
452 2018;19(9).
- 453 14. Arbab AS, Rashid MH, Angara K, Borin TF, Lin PC, Jain M, et al. Major Challenges and  
454 Potential Microenvironment-Targeted Therapies in Glioblastoma. *International journal of*  
455 *molecular sciences.* 2017;18(12).

- 456 15. Achyut BR, Arbab AS. Myeloid cell signatures in tumor microenvironment predicts  
457 therapeutic response in cancer. *OncoTargets and therapy*. 2016;9:1047-55.
- 458 16. Labelle M, Begum S, Hynes RO. Platelets guide the formation of early metastatic niches.  
459 *Proc Natl Acad Sci U S A*. 2014;111(30):E3053-61.
- 460 17. Huong PT, Nguyen LT, Nguyen X-B, Lee SK, Bach D-H. The Role of Platelets in the  
461 Tumor-Microenvironment and the Drug Resistance of Cancer Cells. *Cancers*. 2019;11(2):240.
- 462 18. Yan M, Jurasz P. The role of platelets in the tumor microenvironment: From solid tumors  
463 to leukemia. *Biochimica et Biophysica Acta (BBA) - Molecular Cell Research*. 2016;1863(3):392-  
464 400.
- 465 19. Schlesinger M. Role of platelets and platelet receptors in cancer metastasis. *J Hematol*  
466 *Oncol*. 2018;11(1):125.
- 467 20. Qiu S-Q, Waaijer SJH, Zwager MC, de Vries EGE, van der Vegt B, Schröder CP. Tumor-  
468 associated macrophages in breast cancer: Innocent bystander or important player? *Cancer*  
469 *Treatment Reviews*. 2018;70:178-89.
- 470 21. Choi J, Gyamfi J, Jang H, Koo JS. The role of tumor-associated macrophage in breast  
471 cancer biology. *Histol Histopathol*. 2018;33(2):133-45.
- 472 22. Runa F, Hamalian S, Meade K, Shisgal P, Gray PC, Kelber JA. Tumor microenvironment  
473 heterogeneity: challenges and opportunities. *Curr Mol Biol Rep*. 2017;3(4):218-29.
- 474 23. Tripathi C, Tewari BN, Kanchan RK, Baghel KS, Nautiyal N, Shrivastava R, et al.  
475 Macrophages are recruited to hypoxic tumor areas and acquire a pro-angiogenic M2-polarized  
476 phenotype via hypoxic cancer cell derived cytokines Oncostatin M and Eotaxin. *Oncotarget*.  
477 2014;5(14):5350-68.
- 478 24. Mantovani A, Sozzani S, Locati M, Schioppa T, Saccani A, Allavena P, et al. Infiltration  
479 of tumours by macrophages and dendritic cells: tumour-associated macrophages as a paradigm for  
480 polarized M2 mononuclear phagocytes. *Novartis Found Symp*. 2004;256:137-45; discussion 46-  
481 8, 259-69.
- 482 25. Sica A, Mantovani A. Macrophage plasticity and polarization: in vivo veritas. *The Journal*  
483 *of clinical investigation*. 2012;122(3):787-95.
- 484 26. Tseng D, Volkmer JP, Willingham SB, Contreras-Trujillo H, Fathman JW, Fernhoff NB,  
485 et al. Anti-CD47 antibody-mediated phagocytosis of cancer by macrophages primes an effective  
486 antitumor T-cell response. *Proc Natl Acad Sci U S A*. 2013;110(27):11103-8.
- 487 27. Sica A, Schioppa T, Mantovani A, Allavena P. Tumour-associated macrophages are a  
488 distinct M2 polarised population promoting tumour progression: potential targets of anti-cancer  
489 therapy. *Eur J Cancer*. 2006;42(6):717-27.
- 490 28. Mantovani A, Allavena P, Sica A, Balkwill F. Cancer-related inflammation. *Nature*.  
491 2008;454(7203):436-44.
- 492 29. Germano G, Allavena P, Mantovani A. Cytokines as a key component of cancer-related  
493 inflammation. *Cytokine*. 2008;43(3):374-9.

- 494 30. Pesce J, Kaviratne M, Ramalingam TR, Thompson RW, Urban JF, Jr., Cheever AW, et al.  
495 The IL-21 receptor augments Th2 effector function and alternative macrophage activation. The  
496 Journal of clinical investigation. 2006;116(7):2044-55.
- 497 31. Kurowska-Stolarska M, Stolarski B, Kewin P, Murphy G, Corrigan CJ, Ying S, et al. IL-  
498 33 amplifies the polarization of alternatively activated macrophages that contribute to airway  
499 inflammation. J Immunol. 2009;183(10):6469-77.
- 500 32. Borin TF, Shankar A, Angara K, Rashid MH, Jain M, Iskander A, et al. HET0016 decreases  
501 lung metastasis from breast cancer in immune-competent mouse model. PLoS One.  
502 2017;12(6):e0178830.
- 503 33. Piranlioglu R, Lee E, Ouzounova M, Bollag RJ, Vinyard AH, Arbab AS, et al. Primary  
504 tumor-induced immunity eradicates disseminated tumor cells in syngeneic mouse model. Nature  
505 communications. 2019;10.
- 506 34. Ouzounova M, Lee E, Piranlioglu R, El Andaloussi A, Kolhe R, Demirci MF, et al.  
507 Monocytic and granulocytic myeloid derived suppressor cells differentially regulate  
508 spatiotemporal tumour plasticity during metastatic cascade. Nature communications. 2017;8.
- 509 35. Wang G, Lu X, Dey P, Deng P, Wu CC, Jiang S, et al. Targeting YAP-Dependent MDSC  
510 Infiltration Impairs Tumor Progression. Cancer discovery. 2016;6(1):80-95.
- 511 36. Finke J, Ko J, Rini B, Rayman P, Ireland J, Cohen P. MDSC as a mechanism of tumor  
512 escape from sunitinib mediated anti-angiogenic therapy. International immunopharmacology.  
513 2011;11(7):856-61.
- 514 37. Tesi RJ. MDSC; the Most Important Cell You Have Never Heard Of. Trends in  
515 pharmacological sciences. 2019;40(1):4-7.
- 516 38. Salminen A, Kauppinen A, Kaarniranta K. Myeloid-derived suppressor cells (MDSC): an  
517 important partner in cellular/tissue senescence. Biogerontology. 2018;19(5):325-39.
- 518 39. Salminen A, Kaarniranta K, Kauppinen A. The role of myeloid-derived suppressor cells  
519 (MDSC) in the inflammaging process. Ageing Res Rev. 2018;48:1-10.
- 520 40. Du R, Lu KV, Petritsch C, Liu P, Ganss R, Passegue E, et al. HIF1alpha induces the  
521 recruitment of bone marrow-derived vascular modulatory cells to regulate tumor angiogenesis and  
522 invasion. Cancer Cell. 2008;13(3):206-20.
- 523 41. Hiratsuka S, Watanabe A, Aburatani H, Maru Y. Tumour-mediated upregulation of  
524 chemoattractants and recruitment of myeloid cells predetermines lung metastasis. Nature cell  
525 biology. 2006;8(12):1369-75.
- 526 42. Pawelek JM. Cancer-cell fusion with migratory bone-marrow-derived cells as an  
527 explanation for metastasis: new therapeutic paradigms. Future oncology. 2008;4(4):449-52.
- 528 43. Umansky V, Blattner C, Gebhardt C, Utikal J. The Role of Myeloid-Derived Suppressor  
529 Cells (MDSC) in Cancer Progression. Vaccines (Basel). 2016;4(4).
- 530 44. Shankar A, Borin TF, Iskander A, Varma NRS, Achyut BR, Jain M, et al. Combination of  
531 vatalanib and a 20-HETE synthesis inhibitor results in decreased tumor growth in an animal model  
532 of human glioma. OncoTargets and therapy. 2016;9:1205-19.

- 533 45. Ali MM, Janic B, Babajani-Feremi A, Varma NR, Iskander AS, Anagli J, et al. Changes in  
534 vascular permeability and expression of different angiogenic factors following anti-angiogenic  
535 treatment in rat glioma. *PLoS One*. 2010;5(1):e8727.
- 536 46. Janic B, Jafari-Khouzani K, Babajani-Feremi A, Iskander AS, Varma NR, Ali MM, et al.  
537 MRI tracking of FePro labeled fresh and cryopreserved long term in vitro expanded human cord  
538 blood AC133+ endothelial progenitor cells in rat glioma. *PLoS One*. 2012;7(5):e37577.
- 539 47. Kumar S, Arbab AS, Jain R, Kim J, deCarvalho AC, Shankar A, et al. Development of a  
540 novel animal model to differentiate radiation necrosis from tumor recurrence. *J Neurooncol*.  
541 2012;108(3):411-20.
- 542 48. Highfill SL, Cui Y, Giles AJ, Smith JP, Zhang H, Morse E, et al. Disruption of CXCR2-  
543 mediated MDSC tumor trafficking enhances anti-PD1 efficacy. *Science translational medicine*.  
544 2014;6(237):237ra67.
- 545 49. Lee YS, Choi I, Ning Y, Kim NY, Khatchadourian V, Yang D, et al. Interleukin-8 and its  
546 receptor CXCR2 in the tumour microenvironment promote colon cancer growth, progression and  
547 metastasis. *Br J Cancer*. 2012;106(11):1833-41.
- 548 50. White JR, Lee JM, Young PR, Hertzberg RP, Jurewicz AJ, Chaikin MA, et al.  
549 Identification of a potent, selective non-peptide CXCR2 antagonist that inhibits interleukin-8-  
550 induced neutrophil migration. *J Biol Chem*. 1998;273(17):10095-8.
- 551 51. Remer S, Murphy ME. The challenges of long-term treatment outcomes in adults with  
552 malignant gliomas. *Clin J Oncol Nurs*. 2004;8(4):368-76.
- 553 52. Dhermain F, Ducreux D, Bidault F, Bruna A, Parker F, Roujeau T, et al. [Use of the  
554 functional imaging modalities in radiation therapy treatment planning in patients with  
555 glioblastoma]. *Bull Cancer*. 2005;92(4):333-42.
- 556 53. Mazaris P, Hong X, Altshuler D, Schultz L, Poisson LM, Jain R, et al. Key determinants  
557 of short-term and long-term glioblastoma survival: a 14-year retrospective study of patients from  
558 the Hermelin Brain Tumor Center at Henry Ford Hospital. *Clin Neurol Neurosurg*. 2014;120:103-  
559 12.
- 560 54. Zhu P, Du XL, Lu G, Zhu JJ. Survival benefit of glioblastoma patients after FDA approval  
561 of temozolomide concomitant with radiation and bevacizumab: A population-based study.  
562 *Oncotarget*. 2017;8(27):44015-31.
- 563 55. Ghose A, Lim G, Husain S. Treatment for glioblastoma multiforme: current guidelines and  
564 Canadian practice. *Current oncology (Toronto, Ont)*. 2010;17(6):52-8.
- 565 56. Noch EK, Ramakrishna R, Magge R. Challenges in the Treatment of Glioblastoma:  
566 Multisystem Mechanisms of Therapeutic Resistance. *World Neurosurgery*. 2018;116:505-17.
- 567 57. Kim MM, Umemura Y, Leung D. Bevacizumab and Glioblastoma: Past, Present, and  
568 Future Directions. *Cancer journal*. 2018;24(4):180-6.
- 569 58. Ferrara N, Hillan KJ, Novotny W. Bevacizumab (Avastin), a humanized anti-VEGF  
570 monoclonal antibody for cancer therapy. *Biochem Biophys Res Commun*. 2005;333(2):328-35.
- 571 59. Lim M, Xia Y, Bettgowda C, Weller M. Current state of immunotherapy for glioblastoma.  
572 *Nature Reviews Clinical Oncology*. 2018;15(7):422-42.

- 573 60. Restifo NP, Smyth MJ, Snyder A. Acquired resistance to immunotherapy and future  
574 challenges. *Nat Rev Cancer*. 2016;16(2):121-6.
- 575 61. Soda Y, Myskiw C, Rommel A, Verma IM. Mechanisms of neovascularization and  
576 resistance to anti-angiogenic therapies in glioblastoma multiforme. *J Mol Med (Berl)*.  
577 2013;91(4):439-48.
- 578 62. Kumar S, Arbab AS. Neovascularization in Glioblastoma: Current Pitfall in Anti-  
579 angiogenic therapy. *Zhong liu za zhi*. 2013;1(3):16-9.
- 580 63. Diaz RJ, Ali S, Qadir MG, De La Fuente MI, Ivan ME, Komotar RJ. The role of  
581 bevacizumab in the treatment of glioblastoma. *J Neurooncol*. 2017;133(3):455-67.
- 582 64. Plate KH, Scholz A, Dumont DJ. Tumor angiogenesis and anti-angiogenic therapy in  
583 malignant gliomas revisited. *Acta Neuropathol*. 2012;124(6):763-75.
- 584 65. Arbab AS. Activation of alternative pathways of angiogenesis and involvement of stem  
585 cells following anti-angiogenesis treatment in glioma. *Histol Histopathol*. 2012;27(5):549-57.
- 586 66. Ali MM, Kumar S, Shankar A, Varma NR, Iskander AS, Janic B, et al. Effects of tyrosine  
587 kinase inhibitors and CXCR4 antagonist on tumor growth and angiogenesis in rat glioma model:  
588 MRI and protein analysis study. *Transl Oncol*. 2013;6(6):660-9.
- 589 67. Angara K, Rashid MH, Shankar A, Ara R, Iskander A, Borin TF, et al. Vascular mimicry  
590 in glioblastoma following anti-angiogenic and anti-20-HETE therapies. *Histol Histopathol*.  
591 2017;32(9):917-28.
- 592 68. Ding ZC, Lu X, Yu M, Lemos H, Huang L, Chandler P, et al. Immunosuppressive myeloid  
593 cells induced by chemotherapy attenuate antitumor CD4+ T-cell responses through the PD-1-PD-  
594 L1 axis. *Cancer Res*. 2014;74(13):3441-53.
- 595 69. Achyut BR, Angara K, Jain M, Borin TF, Rashid MH, Iskander ASM, et al. Canonical  
596 NFkappaB signaling in myeloid cells is required for the glioblastoma growth. *Scientific reports*.  
597 2017;7(1):13754.
- 598 70. Rivera LB, Meyronet D, Hervieu V, Frederick MJ, Bergsland E, Bergers G. Intratumoral  
599 myeloid cells regulate responsiveness and resistance to antiangiogenic therapy. *Cell reports*.  
600 2015;11(4):577-91.
- 601 71. Dijkgraaf EM, Heusinkveld M, Tummers B, Vogelpoel LT, Goedemans R, Jha V, et al.  
602 Chemotherapy alters monocyte differentiation to favor generation of cancer-supporting M2  
603 macrophages in the tumor microenvironment. *Cancer Res*. 2013;73(8):2480-92.
- 604 72. Shree T, Olson OC, Elie BT, Kester JC, Garfall AL, Simpson K, et al. Macrophages and  
605 cathepsin proteases blunt chemotherapeutic response in breast cancer. *Genes & development*.  
606 2011;25(23):2465-79.
- 607 73. Bruchard M, Mignot G, Derangere V, Chalmin F, Chevriaux A, Vegran F, et al.  
608 Chemotherapy-triggered cathepsin B release in myeloid-derived suppressor cells activates the  
609 Nlrp3 inflammasome and promotes tumor growth. *Nat Med*. 2013;19(1):57-64.
- 610 74. Butowski N, Colman H, De Groot JF, Omuro AM, Nayak L, Wen PY, et al. Orally  
611 administered colony stimulating factor 1 receptor inhibitor PLX3397 in recurrent glioblastoma: an

612 Ivy Foundation Early Phase Clinical Trials Consortium phase II study. *Neuro-Oncology*.  
613 2015;18(4):557-64.

614 75. Quail DF, Bowman RL, Akkari L, Quick ML, Schuhmacher AJ, Huse JT, et al. The tumor  
615 microenvironment underlies acquired resistance to CSF-1R inhibition in gliomas. *Science*.  
616 2016;352(6288):aad3018.

617 76. Chen L, Tang S, Zhang FF, Garcia V, Falck JR, Schwartzman ML, et al. CYP4A/20-HETE  
618 regulates ischemia-induced neovascularization via its actions on endothelial progenitor and  
619 preexisting endothelial cells. *Am J Physiol-Heart C*. 2019;136(6):H1468-H79.

620 77. Gupta SK, Mladek AC, Carlson BL, Boakye-Agyeman F, Bakken KK, Kizilbash SH, et  
621 al. Discordant in vitro and in vivo chemopotentiating effects of the PARP inhibitor veliparib in  
622 temozolomide-sensitive versus -resistant glioblastoma multiforme xenografts. *Clin Cancer Res*.  
623 2014;20(14):3730-41.

624 78. Lesueur P, Lequesne J, Grellard J-M, Dugué A, Coquan E, Brachet P-E, et al. Phase I/IIa  
625 study of concomitant radiotherapy with olaparib and temozolomide in unresectable or partially  
626 resectable glioblastoma: OLA-TMZ-RTE-01 trial protocol. *BMC Cancer*. 2019;19(1):198.

627

628

629

630

631

632

633

634

635

636

637

638

639

640

641

642



643 **Figure legends:**

644

645 **Figure 1: CSF1R conditional knockout mouse and GBM development.** (A) Agarose gel  
646 electrophoresis showing homozygous CSF1R<sup>flox/flox</sup>/MX1-Cre+ (knockout) genotype. (B) Flow-  
647 cytometric analysis of peripheral blood cells from conditional knock out mice showed a significant dose-  
648 dependent decrease in CD45+CSF1R+ cells following two weeks of treatments with poly-IC. (C)  
649 Flow-cytometric analysis of peripheral blood cells from wild type mice did not show any significant  
650 difference in CD45+CSF1R+ cells following two weeks of treatments with poly-IC. (D and E)  
651 Optical images and quantified photon intensities of pre and post-treatment (either vehicle or  
652 SB225002) showed significantly increased tumor growth in the vehicle-treated wild type animals  
653 after 3 weeks. Knock out animals treated with either vehicle or SB225002 and wild type animals  
654 treated with SB225002 did not show any significant tumor growth after 3 weeks. (F) Flow-  
655 cytometric analysis showing significantly decreased tumor-associated CD45+CD11b+CD86+ and  
656 CD45+CD11b+CD206+ cells.

657 **Figure 2: Flow cytometric analysis of T-cells and myeloid cell populations in wild type and**  
658 **knockout animals.** There was a significant increase in CD4, CD8, CD11b, and Ly6G positive  
659 cells in tumors treated with TMZ (red arrows) while irradiation caused a significant reduction  
660 (black arrows) in different cellular populations compared to control group. All other treatments  
661 showed increased infiltration of CD4 and CD8 T-cells but insignificant changes in MDSCs,  
662 CD11b populations.

663

664 **Figure 3: Flowcytometric analysis of M1 and M2 macrophage populations.** Treatment with  
665 Navarixin and GW2580 increased the macrophage population insignificantly, and all other  
666 treatments changed the macrophage population inconsequentially.

667

668 **Figure 4: Bioluminescent image-based analysis of tumor growth.** All animals underwent  
669 optical imaging to monitor tumor growth before starting the treatment (day 8 post-inoculation), 1  
670 week, and 2 weeks after treatment. There was no significant difference between all treatment  
671 groups compared to that of vehicle-treated animals after 1 week of treatment except the Vatanallib  
672 treated group that showed significant tumor growth. Following 2 weeks of treatment, tumor  
673 growths were substantially increased in the vehicle, Vatalanib, and TMZ treated animals. All other  
674 groups showed increased tumor growth but were significantly slower than the above-mentioned  
675 groups.

676

677 **Figure 5: Survival studies showing improved survival following the use of TME targeting**  
678 **agents.** (A and B) Kaplan-Meier curve showing significantly increased survival in animal groups  
679 treated with TMZ, HET0016, TMZ+HET0016, and with a HET analog. Although Navarixin)  
680 increased survival, the addition of TMZ with it did not improve the outcome.

Fig 1

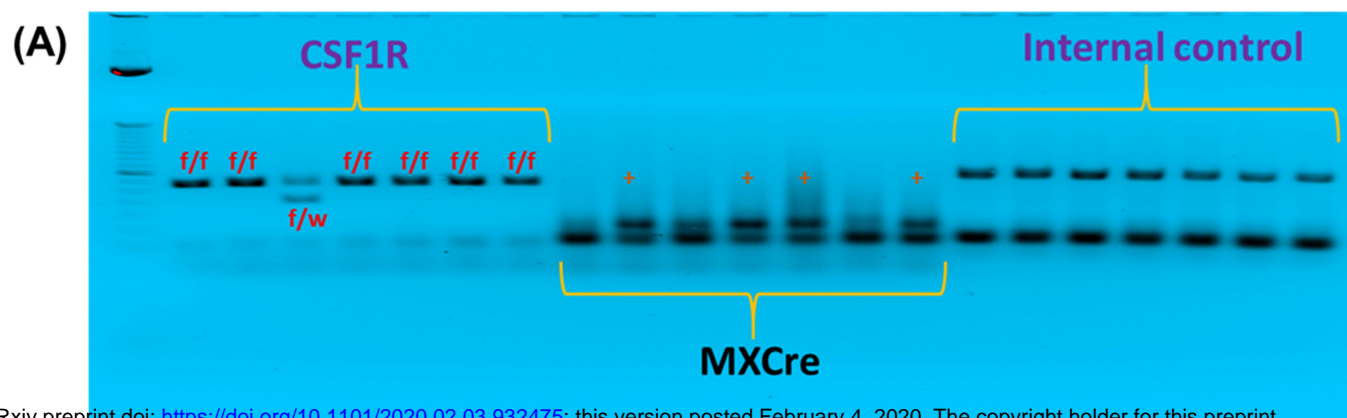

bioRxiv preprint doi: <https://doi.org/10.1101/2020.02.03.932475>; this version posted February 4, 2020. The copyright holder for this preprint (which was not certified by peer review) is the author/funder, who has granted bioRxiv a license to display the preprint in perpetuity. It is made available under aCC-BY-NC-ND 4.0 International license.

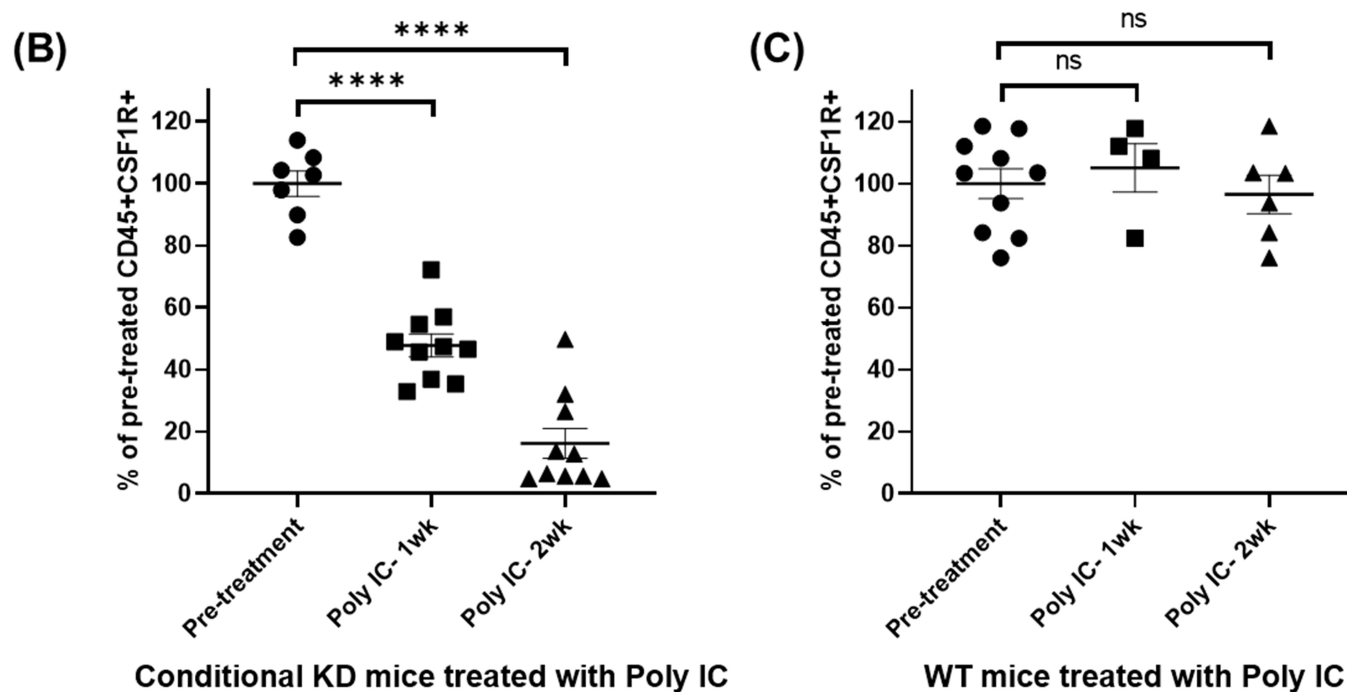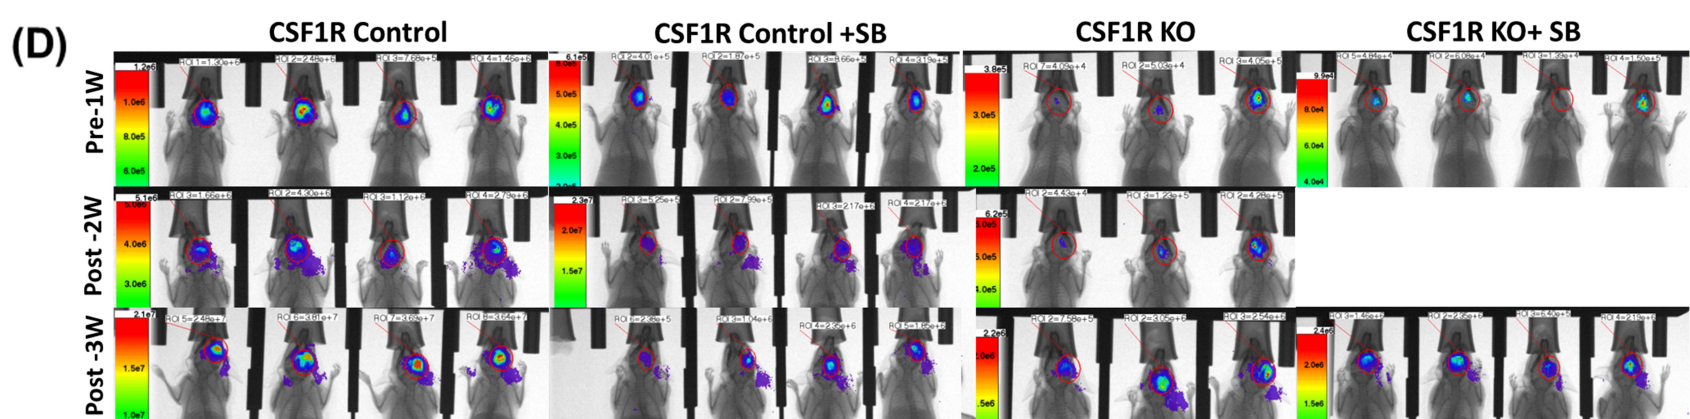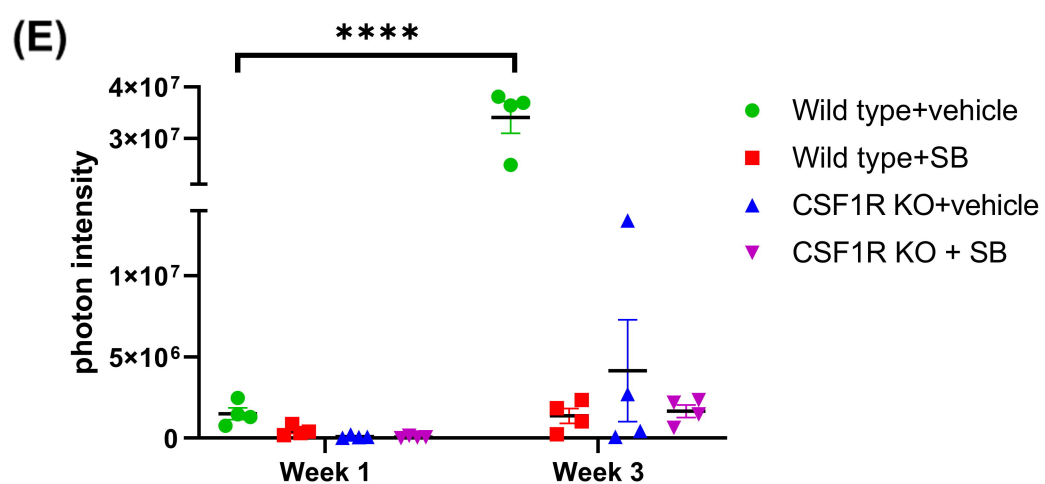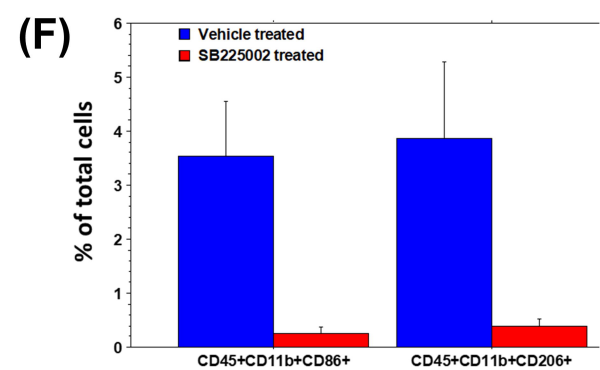

Fig 2

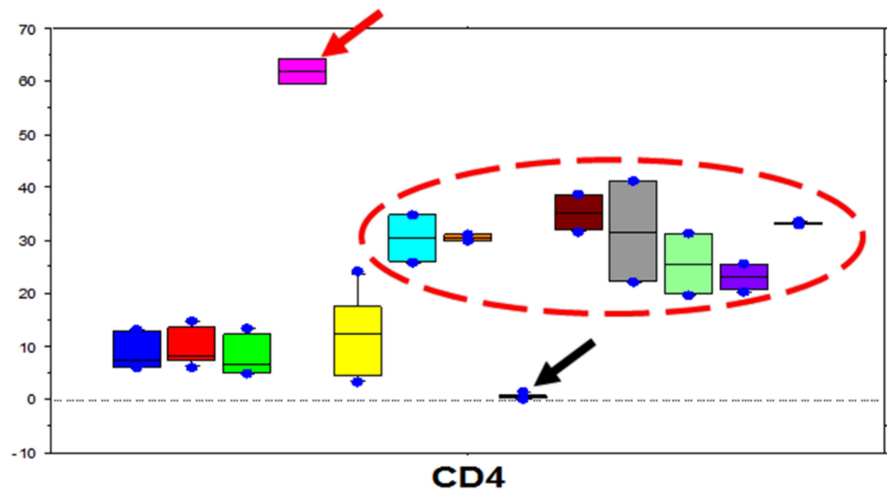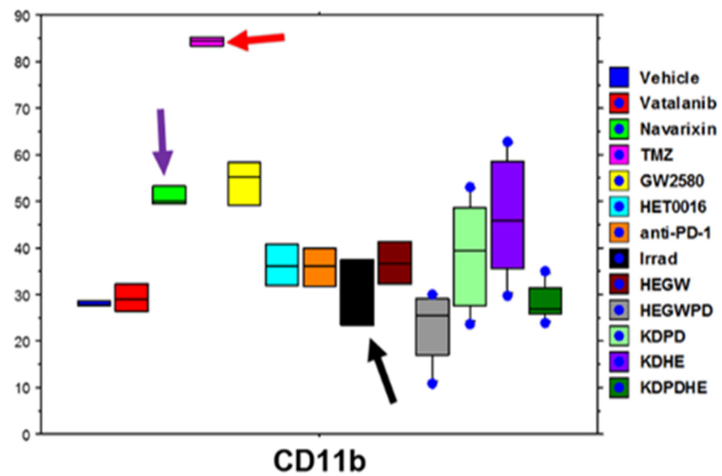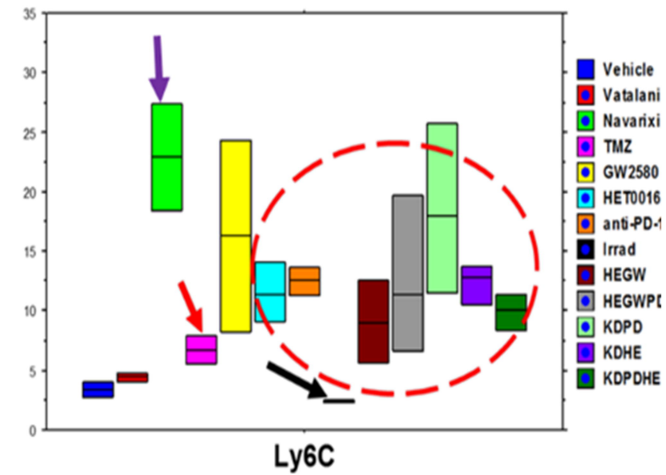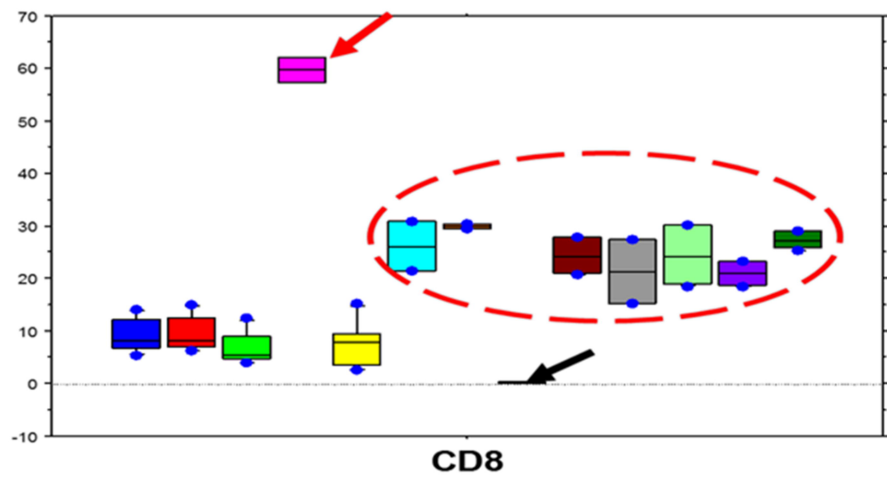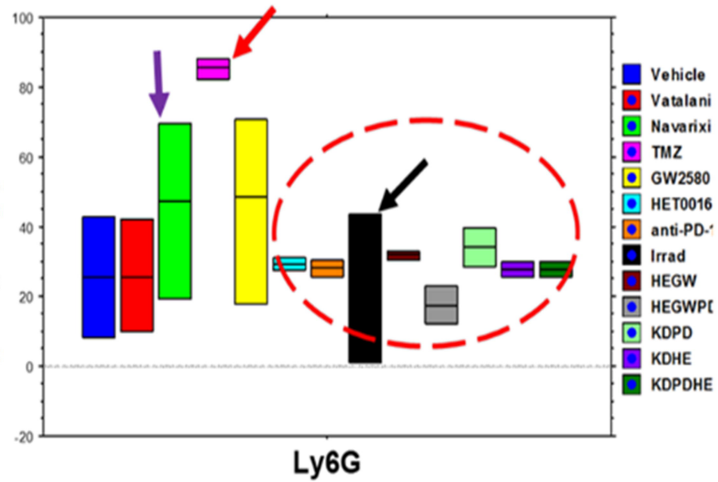

Fig 3

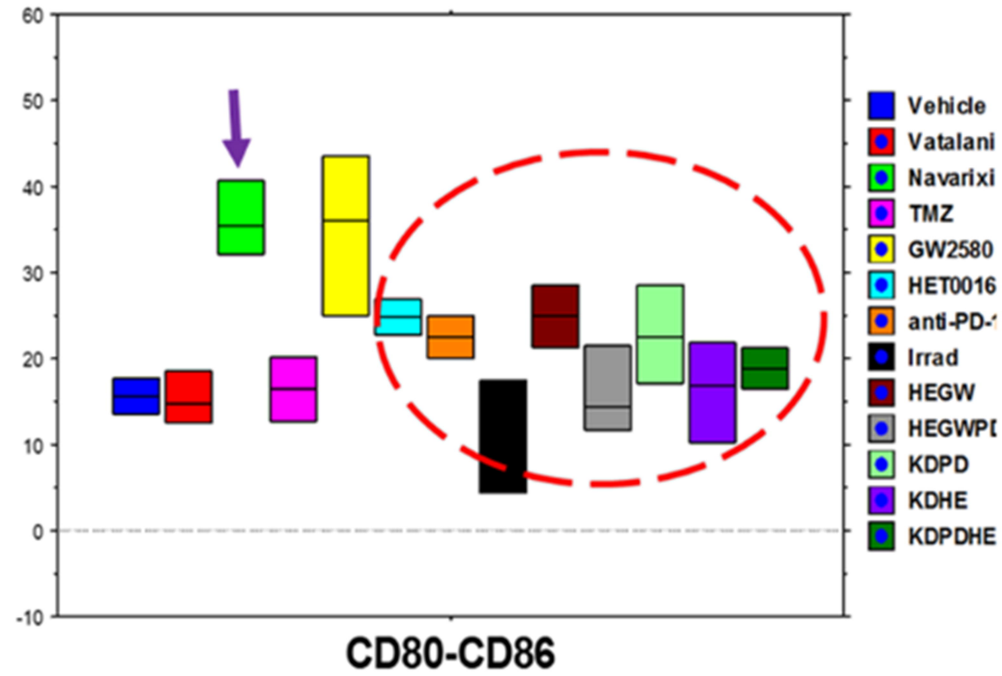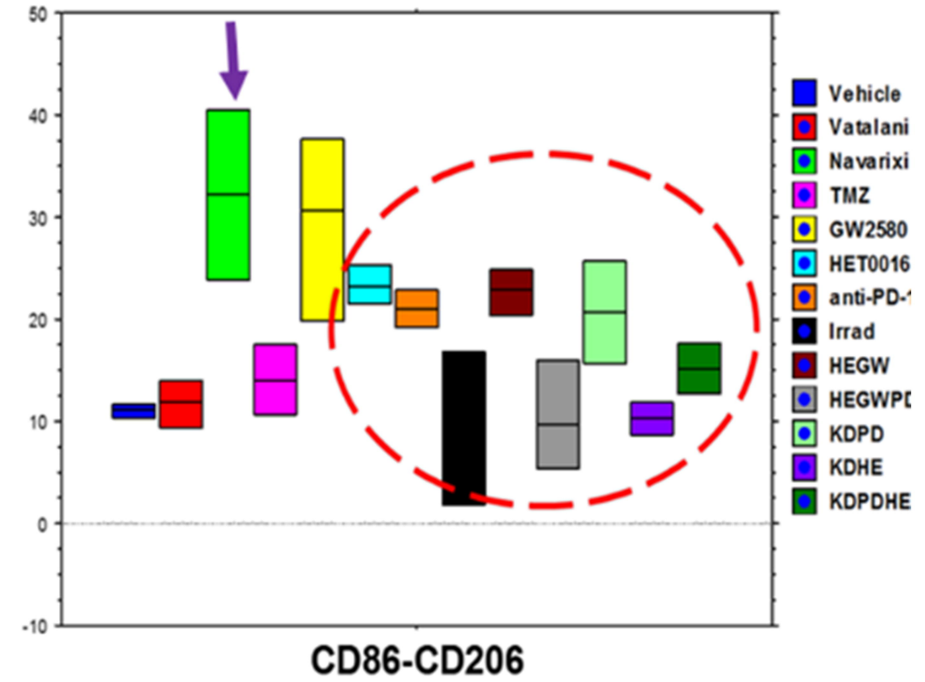

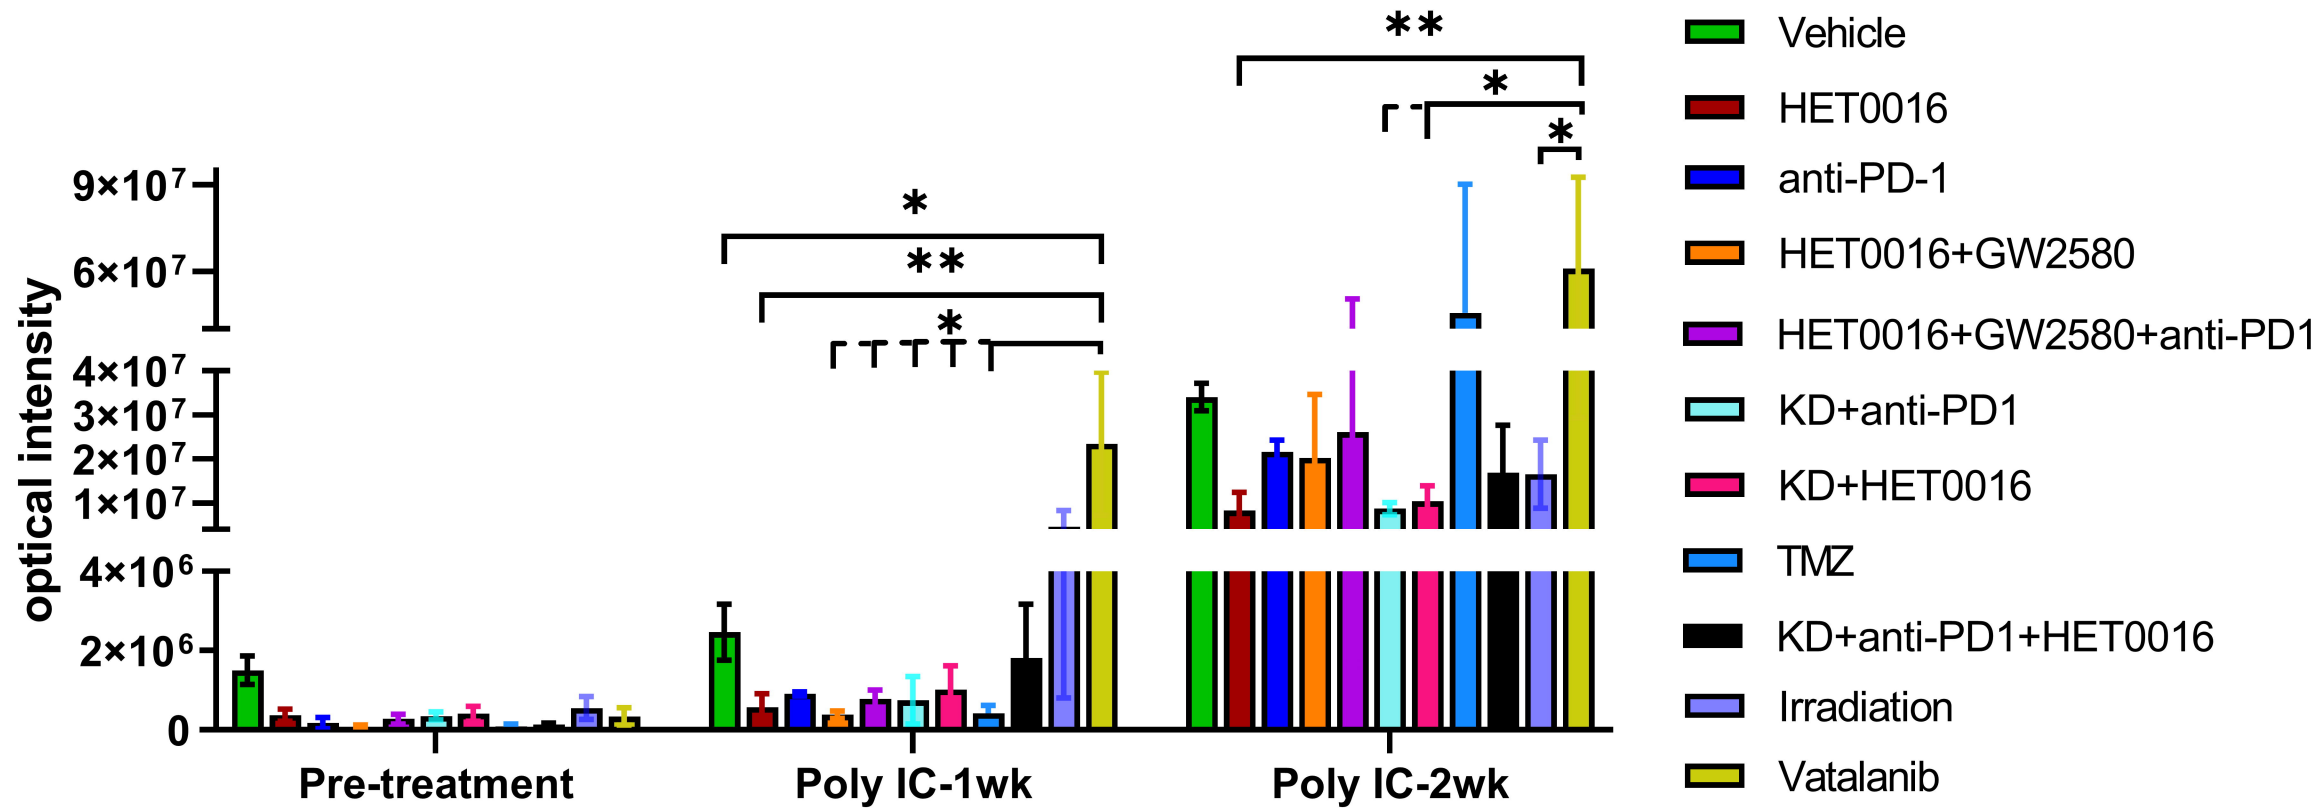

Fig 5

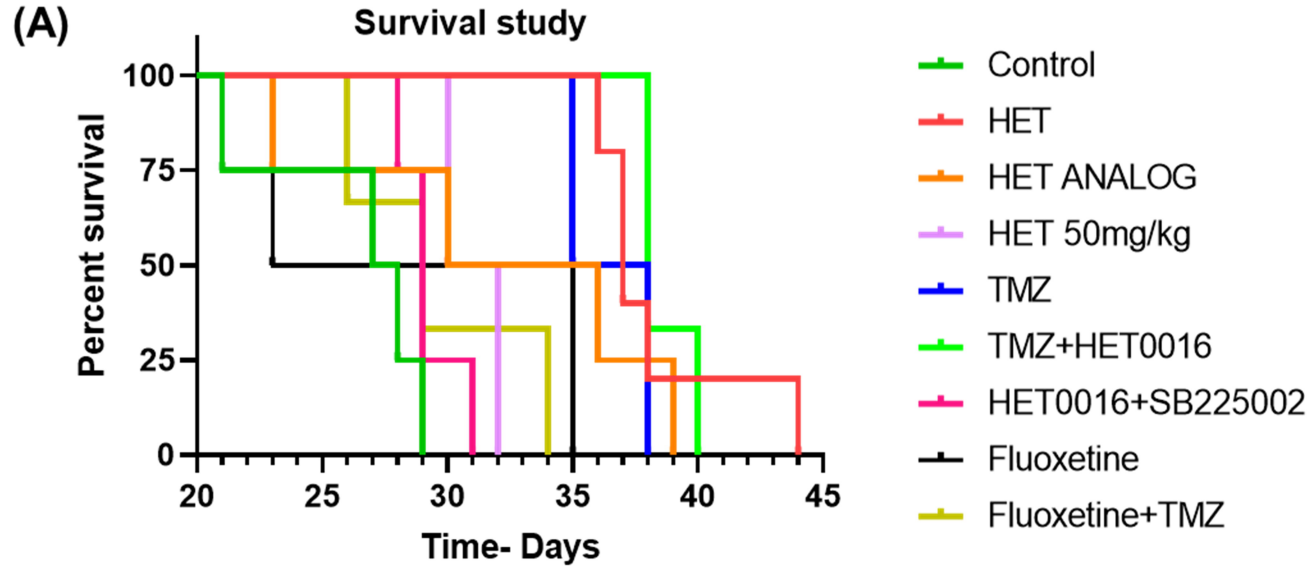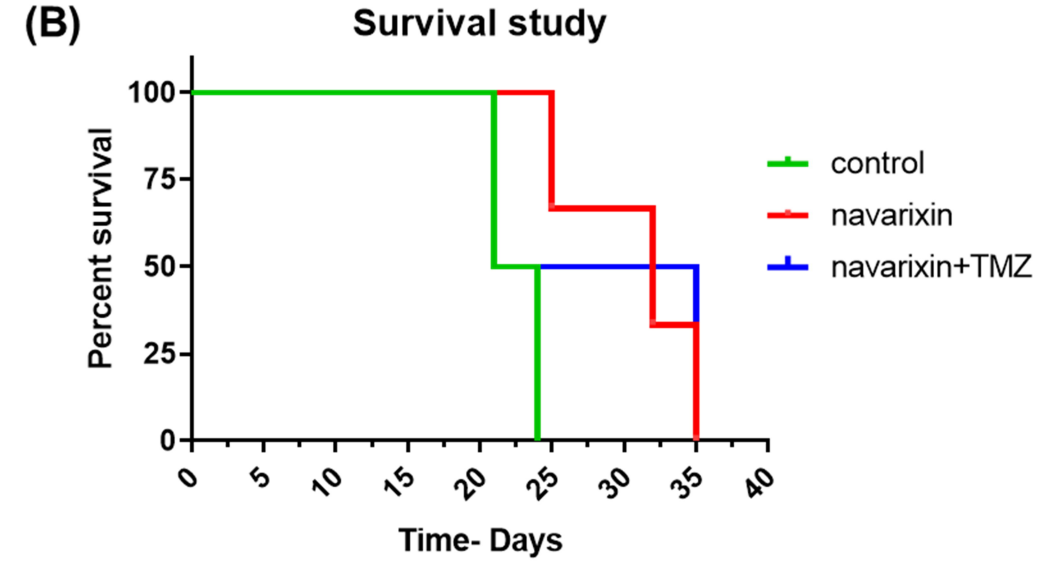

Comparison of Survival Curves-Log-rank (Mantel-Cox) test:

| Comparison     | Control vs HET0016 | Control vs HET 50mg/kg | Control vs TMZ | Control vs HET0016+TMZ |
|----------------|--------------------|------------------------|----------------|------------------------|
| <i>p</i> value | **0.002            | *0.04                  | *0.04          | *0.01                  |
